# Supplementary material
Source: Springer Nature journal article supplement (https://www.springerprofessional.de/resource/supplementary/40095_2011_8_MOESM6_ESM.pdf/11899688)

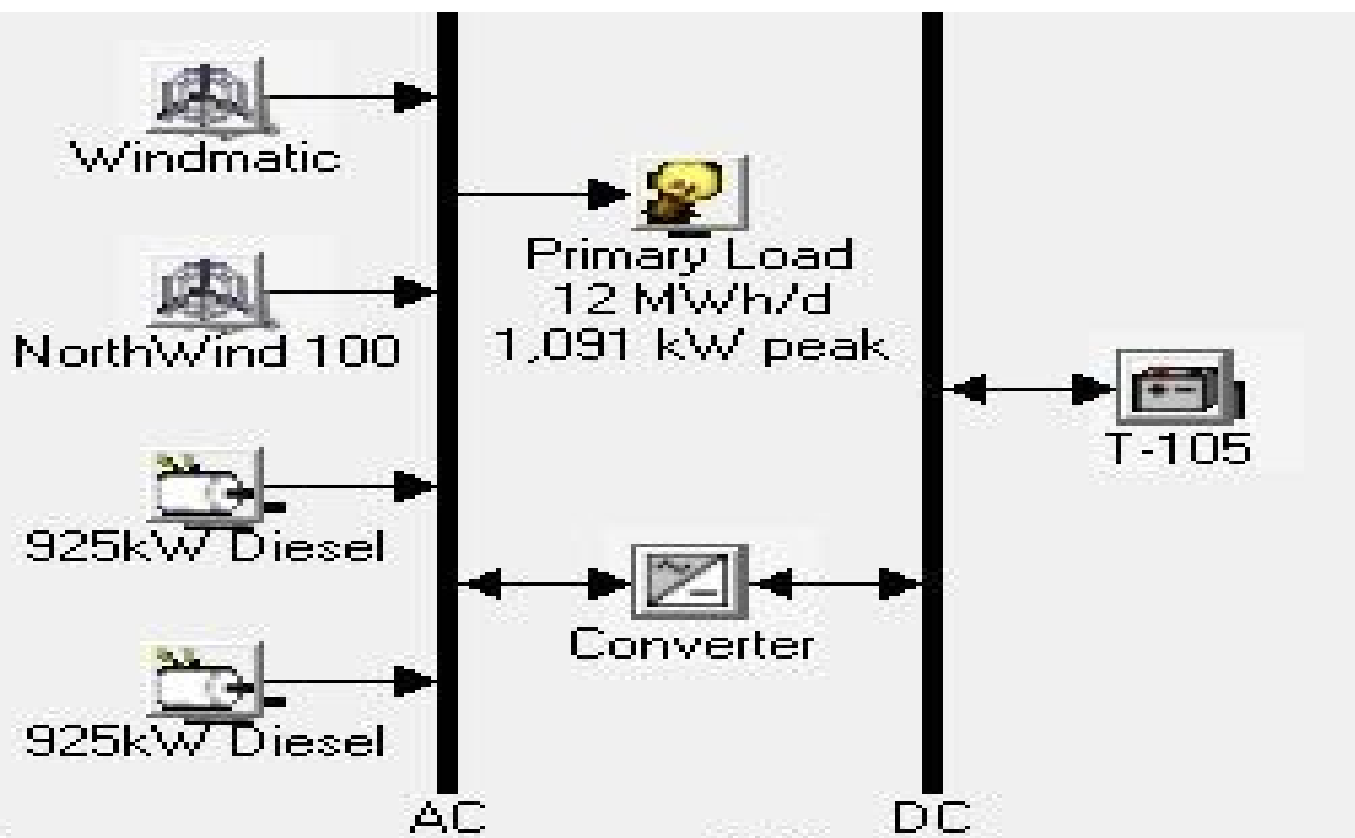

Supplement: MOESM6 [file 11899688]
